# Supplementary material for: Topical Delivery of Niacinamide to Skin Using Hybrid Nanogels Enhances Photoprotection Effect
Source: MDPI journal article supplement (doi:10.3390/pharmaceutics13111968), 2021-11-20
Supplement: s1 [file s1]

# Supplementary Materials: Topical Delivery of Niacinamide to Skin Using Hybrid Nanogels Enhances Photoprotection Effect

Renata Basto, Raquel Andrade, Cláudia Nunes, Sofia Lima \* and Salette Reis

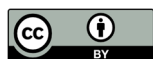

**Copyright:** © 2021 by the authors. Licensee MDPI, Basel, Switzerland. This article is an open access article distributed under the terms and conditions of the Creative Commons Attribution (CC BY) license (<https://creativecommons.org/licenses/by/4.0/>).

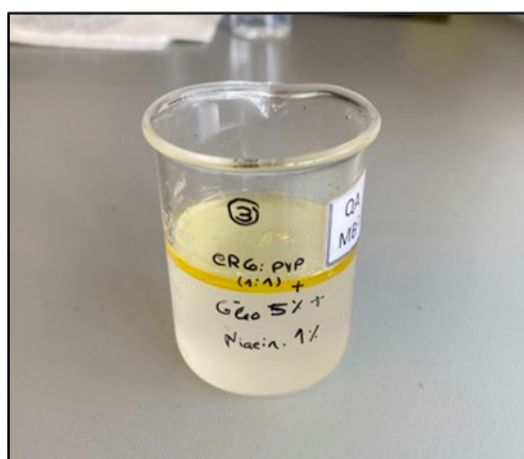

**Figure S1.** Photograph of one of the optimized hydrogel combinations (CRG-PVP (1:1) + NIA 1% (w/w) + jojoba oil 5%).

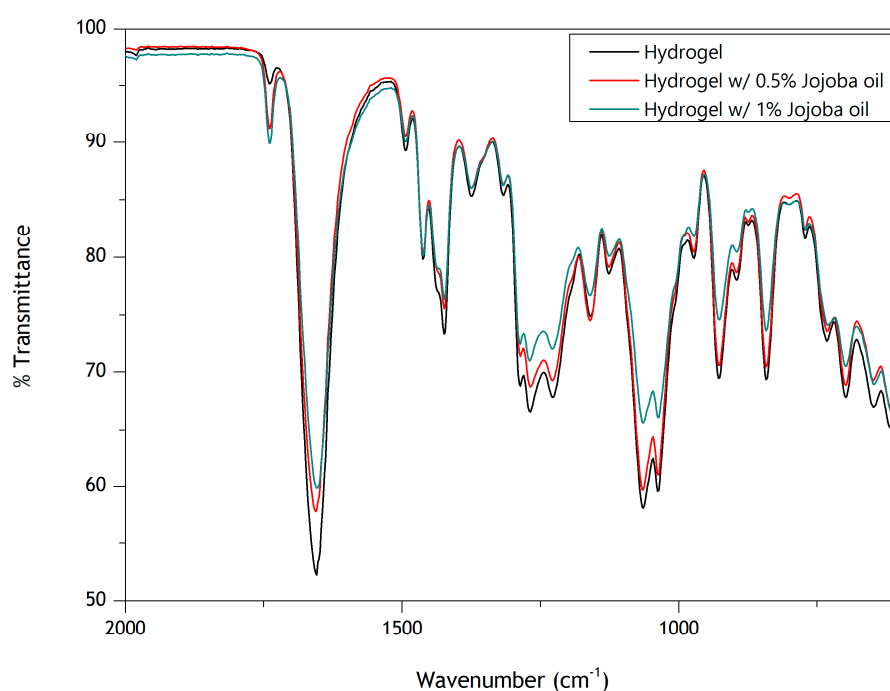

**Figure S2.** Evaluation of jojoba oil effect on NIA-loaded hydrogel's chemical nature through FTIR.

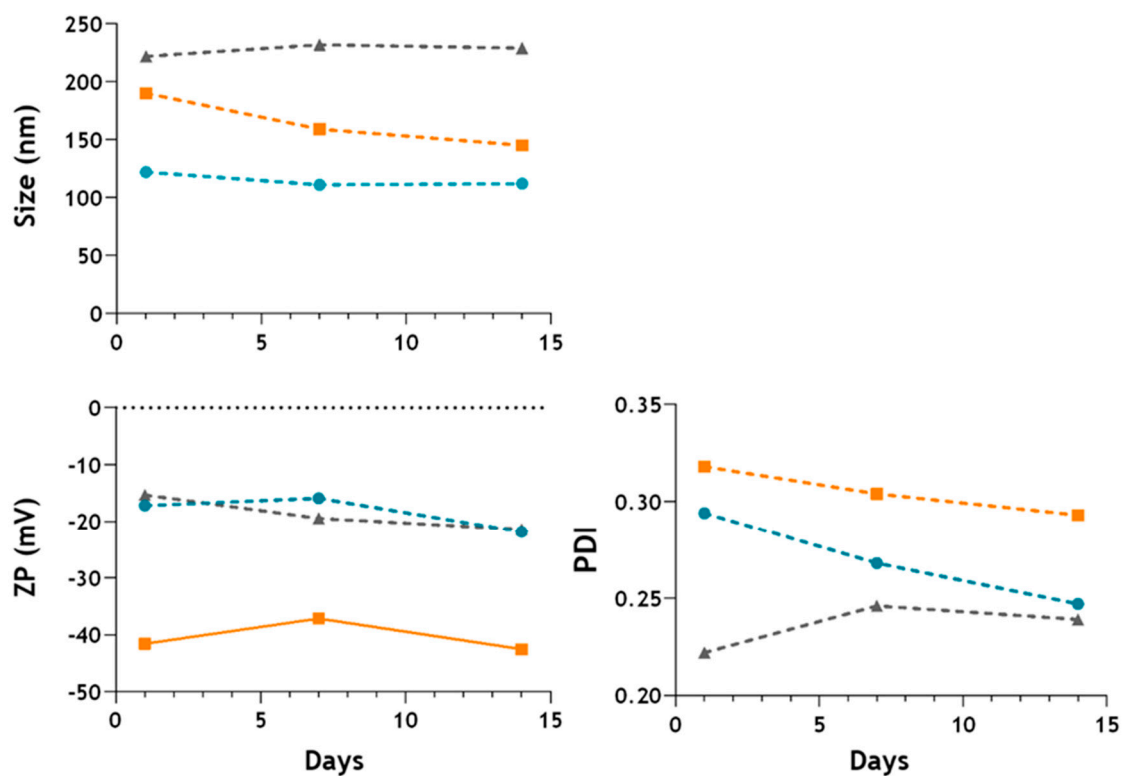

**Figure S3.** Storage stability of NIA-loaded TEs tween 80 (blue), oleic acid (orange) and jojoba oil (grey) at 4 °C over 2 weeks. Size, zeta potential and polydispersity index values displayed (Size: SD < 2%; ZP: SD < 5%; PDI: SD < 3%).

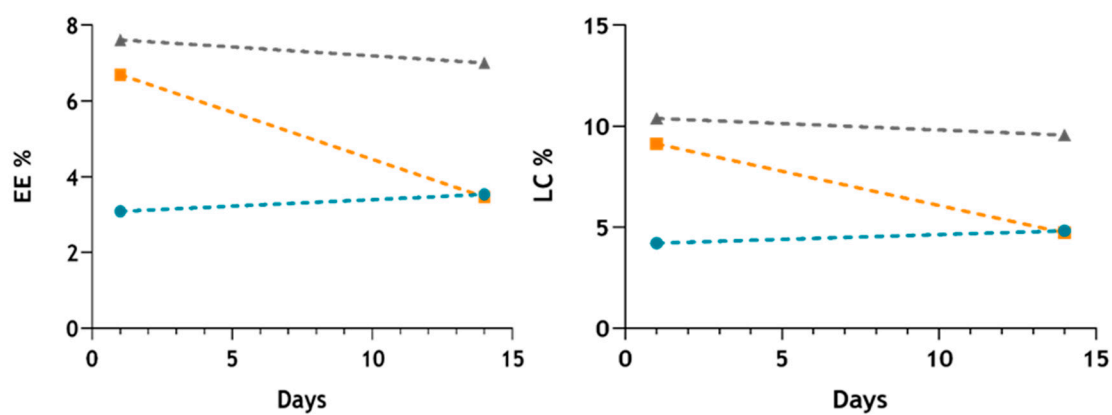

**Figure S4.** Storage stability of NIA-loaded TEs tween 80 (blue), oleic acid (orange) and jojoba oil (grey) at 4 °C over 8 weeks. EE% and LC% values displayed.

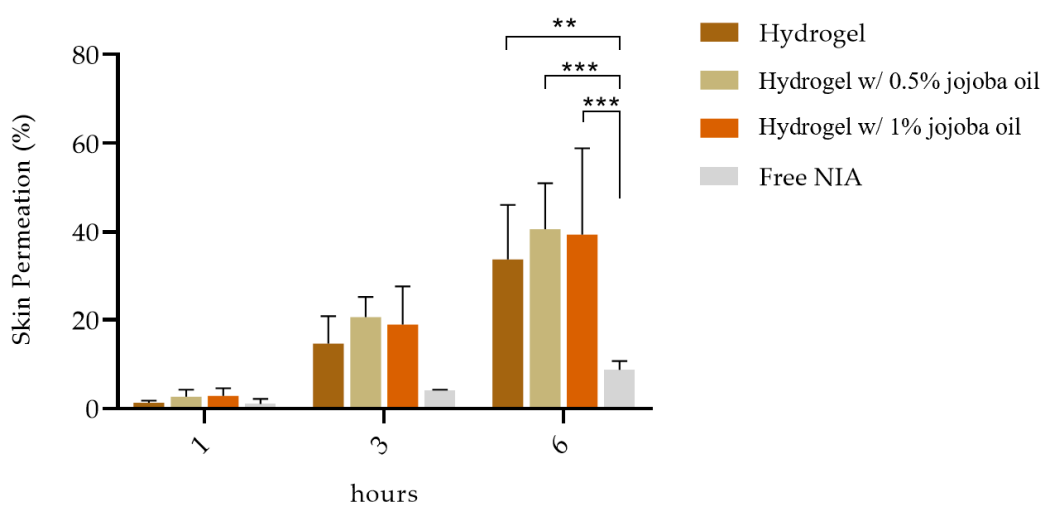

**Figure S5.** In vitro skin permeation results of free NIA, and NIA-loaded developed hydrogels, from four independent experiments ( $n = 4$ ). Asterisks indicate statistical significance (\*,  $p \leq 0.05$ ; \*\*,  $p \leq 0.01$ ; \*\*\*,  $p \leq 0.001$ ; \*\*\*\*,  $p \leq 0.0001$ ). No asterisks indicate no statistical significance ( $p > 0.05$ ).

**Table S1.** Characterization of non-loaded TEs.

|            | PS (nm)      | PDI               | ZP (mV)     |
|------------|--------------|-------------------|-------------|
| tween 80   | $132 \pm 1$  | $0.290 \pm 0.002$ | $-15 \pm 3$ |
| oleic acid | $320 \pm 27$ | $0.316 \pm 0.011$ | $-31 \pm 1$ |
| jojoba oil | $249 \pm 4$  | $0.250 \pm 0.011$ | $-19 \pm 1$ |

Each value represents the mean  $\pm$  SD of 3 independent measurements ( $n = 3$ ). PS—particular size; PDI—polydispersity index; ZP—zeta potential; LC—loading capacity.
